# Supplementary material for: Bridging the gap: viable reaction pathways from tetrahedrane to benzyne
Source: Royal Society of Chemistry journal article supplement (doi:10.1039/d3cp06199j), 2024-01-01
Supplement: d3cp06199j1.pdf [file d3cp06199j1.pdf]

Electronic Supplementary Material (ESI) for Physical Chemistry Chemical Physics.  
This journal is © the Owner Societies 2023

Electronic Supplementary Information for:  
Bridging the gap: viable reaction pathways from  
tetrahedrane to benzene and benzyne

Cartesian Coordinates for each structure at the CCSD(T)-F12b/cc-pVTZ-F12 level of theory, and transition states at the B3LYP/aug-CC-pVTZ level of theory.

Tetrahdrane (C<sub>4</sub>H<sub>4</sub>)

|   |               |               |               |
|---|---------------|---------------|---------------|
| C | 0.7394447926  | 0.0000000000  | 0.5228484649  |
| C | -0.7394447926 | 0.0000000000  | 0.5228484649  |
| C | 0.0000000000  | -0.7394447926 | -0.5228484649 |
| C | 0.0000000000  | 0.7394447926  | -0.5228484649 |
| H | 1.6118611566  | 0.0000000000  | 1.1398238501  |
| H | -1.6118611566 | 0.0000000000  | 1.1398238501  |
| H | 0.0000000000  | -1.6118611566 | -1.1398238501 |
| H | 0.0000000000  | 1.6118611566  | -1.1398238501 |

Benzvalyne (C<sub>6</sub>H<sub>4</sub>)

|   |              |              |              |
|---|--------------|--------------|--------------|
| C | -0.624235799 | 0.000000000  | 1.255064411  |
| C | 0.624235799  | 0.000000000  | 1.255064411  |
| C | -1.069102992 | 0.000000000  | -0.140443387 |
| C | 1.069102992  | 0.000000000  | -0.140443387 |
| C | 0.000000000  | 0.758178537  | -0.929585749 |
| C | 0.000000000  | -0.758178537 | -0.929585749 |
| H | -2.099093572 | 0.000000000  | -0.462623651 |
| H | 2.099093572  | 0.000000000  | -0.462623651 |
| H | 0.000000000  | 1.465344051  | -1.742327724 |
| H | 0.000000000  | -1.465344051 | -1.742327724 |

Benzyne (C<sub>6</sub>H<sub>4</sub>)

|   |             |              |              |
|---|-------------|--------------|--------------|
| C | 0.000000000 | -0.711729735 | -1.120345871 |
| C | 0.000000000 | 0.711729735  | -1.120345871 |
| C | 0.000000000 | 1.475234669  | 0.079087260  |
| C | 0.000000000 | -1.475234669 | 0.079087260  |
| C | 0.000000000 | 0.640023260  | 1.209501735  |
| C | 0.000000000 | -0.640023260 | 1.209501735  |
| H | 0.000000000 | -2.571130469 | 0.078749014  |
| H | 0.000000000 | 2.571130469  | 0.078749014  |
| H | 0.000000000 | 1.240194489  | -2.083598667 |
| H | 0.000000000 | -1.240194489 | -2.083598667 |

Benzvalene (C<sub>6</sub>H<sub>6</sub>)

|   |              |              |              |
|---|--------------|--------------|--------------|
| C | -0.726407878 | 0.000000000  | 1.012120875  |
| C | 0.726407878  | 0.000000000  | 1.012120875  |
| C | 0.000000000  | 1.073793413  | 0.210180028  |
| C | 0.000000000  | -1.073793413 | 0.210180028  |
| H | 0.000000000  | -2.099784319 | 0.549500747  |
| H | 0.000000000  | 2.099784319  | 0.549500747  |
| C | 0.000000000  | -0.671124591 | -1.243148218 |
| C | 0.000000000  | 0.671124591  | -1.243148218 |
| H | 0.000000000  | 1.346767996  | -2.083675061 |
| H | 0.000000000  | -1.346767996 | -2.083675061 |
| H | 1.478709265  | 0.000000000  | 1.783454017  |
| H | -1.478709265 | 0.000000000  | 1.783454017  |

Benzene (C<sub>6</sub>H<sub>6</sub>)

|   |             |              |              |
|---|-------------|--------------|--------------|
| C | 0.000000000 | 0.000000000  | 0.000000000  |
| C | 0.000000000 | 1.39354993   | -0.000000000 |
| C | 0.000000000 | 2.09032489   | -1.20684964  |
| C | 0.000000000 | 1.39354993   | -2.41369928  |
| C | 0.000000000 | -0.000000000 | -2.41369928  |
| C | 0.000000000 | -0.69677496  | -1.20684964  |
| H | 0.000000000 | -1.77945859  | -1.20684964  |
| H | 0.000000000 | -0.54134181  | -3.35133080  |
| H | 0.000000000 | 1.93489174   | -3.35133080  |
| H | 0.000000000 | 3.17300851   | -1.20684964  |
| H | 0.000000000 | 1.93489174   | 0.93763152   |
| H | 0.000000000 | -0.54134181  | 0.93763152   |

Diatomic Carbon (C<sub>2</sub>)

|   |             |             |               |
|---|-------------|-------------|---------------|
| C | 0.000000000 | 0.000000000 | -0.6223020365 |
| C | 0.000000000 | 0.000000000 | 0.6223020365  |

Ethyne Radical (C<sub>2</sub>H)

|   |             |             |               |
|---|-------------|-------------|---------------|
| C | 0.000000000 | 0.000000000 | -0.6722923016 |
| C | 0.000000000 | 0.000000000 | 0.5378422902  |
| H | 0.000000000 | 0.000000000 | 1.6021579524  |

Acetylene (HCCH)

|   |            |             |             |
|---|------------|-------------|-------------|
| C | 0.00000000 | 0.00000000  | 0.00000000  |
| C | 0.00000000 | 0.00000000  | 1.20548154  |
| H | 0.00000000 | 0.00000000  | 2.26860752  |
| H | 0.00000000 | -0.00000000 | -1.06312599 |

Vinylidene (H<sub>2</sub>C=C:)

|   |              |               |               |
|---|--------------|---------------|---------------|
| C | 0.0000000000 | 0.0000000000  | -0.7431849209 |
| C | 0.0000000000 | 0.0000000000  | 0.5583543031  |
| H | 0.0000000000 | 0.9406248706  | 1.1012563002  |
| H | 0.0000000000 | -0.9406248706 | 1.1012563002  |

Diatomic Hydrogen (H<sub>2</sub>)

|   |              |              |               |
|---|--------------|--------------|---------------|
| H | 0.0000000000 | 0.0000000000 | -0.3708352481 |
| H | 0.0000000000 | 0.0000000000 | 0.3708352481  |

C<sub>2</sub>H Addition to C<sub>4</sub>H<sub>4</sub>

II

|   |              |              |              |
|---|--------------|--------------|--------------|
| C | -0.722789032 | 0.000000000  | 1.160725439  |
| C | 0.722789032  | 0.000000000  | 1.160725439  |
| C | 0.000000000  | 0.979627472  | 0.239614112  |
| C | 0.000000000  | -0.979627472 | 0.239614112  |
| H | 0.000000000  | -2.057532772 | 0.261456726  |
| H | 0.000000000  | 2.057532772  | 0.261456726  |
| C | 0.000000000  | 0.000000000  | -0.923666596 |
| C | 0.000000000  | 0.000000000  | -2.231962026 |
| H | 1.545873127  | 0.000000000  | 1.853400654  |
| H | -1.545873127 | 0.000000000  | 1.853400654  |

TS1

|   |           |           |           |
|---|-----------|-----------|-----------|
| C | -0.923245 | -0.245197 | -0.727239 |
| C | -0.476022 | 1.016375  | -0.000338 |
| C | 0.212622  | -0.941271 | 0.000184  |
| C | -0.923385 | -0.244471 | 0.727158  |
| H | -1.628921 | -0.480685 | -1.505610 |
| H | -0.984574 | 1.964497  | -0.000647 |
| H | 0.366941  | -2.007805 | 0.001559  |
| H | -1.628690 | -0.479328 | 1.506047  |
| C | 0.975755  | 0.769875  | 0.000416  |
| C | 1.780148  | -0.188092 | -0.000405 |

C<sub>2</sub>H Addition to C<sub>4</sub>H<sub>4</sub>

I1

|   |              |              |              |
|---|--------------|--------------|--------------|
| C | -0.007934417 | -0.541555995 | -1.367429612 |
| C | 0.995835288  | -0.094423929 | -0.307746591 |
| C | -0.004335865 | 0.874721549  | -0.888366596 |
| C | -0.997829973 | -0.083880329 | -0.302333364 |
| H | -2.081032601 | -0.091488116 | -0.342606343 |
| C | 0.017879528  | -0.398453286 | 0.817906994  |
| C | 0.037424469  | 0.209351245  | 2.190334801  |
| H | -0.431071560 | -0.331616009 | 3.004247227  |
| H | 0.001163611  | 1.731836638  | -1.534755810 |
| H | 2.075477593  | -0.117968862 | -0.367858081 |
| H | -0.025670375 | -0.724267689 | -2.433091655 |

I2

|   |              |              |              |
|---|--------------|--------------|--------------|
| C | -0.728304040 | -0.138905636 | -0.972347839 |
| C | 0.728304040  | -0.138905636 | -0.972347839 |
| C | 0.000000000  | -1.064854840 | -0.002369896 |
| C | 0.000000000  | 1.058922165  | -0.370820884 |
| H | 0.000000000  | 2.017183498  | -0.865242506 |
| C | 0.000000000  | 0.863067048  | 1.114782824  |
| C | 0.000000000  | -0.443623112 | 1.385643079  |
| H | 0.000000000  | -0.972299038 | 2.323084313  |
| H | 1.480932435  | -0.265186667 | -1.733585205 |
| H | -1.480932435 | -0.265186667 | -1.733585205 |
| H | 0.000000000  | -2.132621996 | -0.169323170 |

## I3

|   |              |              |              |
|---|--------------|--------------|--------------|
| C | -0.138714159 | -0.729845636 | -0.971733306 |
| C | -0.138714159 | 0.729845636  | -0.971733306 |
| C | 1.058900288  | 0.000000000  | -0.370741992 |
| C | -1.065060124 | 0.000000000  | -0.002636775 |
| H | -2.132402953 | 0.000000000  | -0.169432828 |
| C | -0.443490675 | 0.000000000  | 1.385352525  |
| C | 0.862901125  | 0.000000000  | 1.114457752  |
| H | -0.972788932 | 0.000000000  | 2.322913189  |
| H | -0.265872546 | 1.478197395  | -1.736109864 |
| H | -0.265872546 | -1.478197395 | -1.736109864 |
| H | 2.017339964  | 0.000000000  | -0.864937885 |

## TS

|   |             |             |             |
|---|-------------|-------------|-------------|
| C | 0.000000000 | 0.000000000 | 0.000000000 |
| C | 0.77756800  | -1.08495779 | -0.74066600 |
| C | -0.03363600 | -0.00004926 | -1.44297900 |
| C | 0.77750267  | 1.08495507  | -0.74073855 |
| H | 0.43870600  | 2.10924435  | -0.73062805 |
| C | 2.22524514  | 0.66193673  | -0.83802027 |
| C | 2.22528500  | -0.66185879 | -0.83797600 |
| H | -0.81380300 | -0.00009750 | -2.18349300 |
| H | 0.43883300  | -2.10926679 | -0.73048700 |
| H | -0.75733899 | 0.00000280  | 0.76550701  |
| H | 2.70673999  | 0.00008727  | 0.17306499  |

C<sub>6</sub>H<sub>4</sub> Isomer 1

|   |             |             |             |
|---|-------------|-------------|-------------|
| C | 0.000000000 | 0.000000000 | 0.000000000 |
| C | 0.72299249  | -1.09533484 | -0.73907077 |
| C | -0.00022490 | 0.00012116  | -1.47774182 |
| C | 0.93525309  | 0.99276590  | -0.73893187 |
| H | 0.68918106  | 2.05151151  | -0.73880761 |
| C | 2.34770738  | 0.39192258  | -0.73919609 |
| C | 2.07395224  | -0.92434256 | -0.73926235 |
| H | 3.27992902  | 0.93336444  | -0.73929357 |
| H | -0.79865791 | 0.08403125  | -2.19767542 |
| H | -0.79821385 | 0.08379201  | 0.72019034  |

C<sub>6</sub>H<sub>4</sub> Isomer 2

|   |               |               |               |
|---|---------------|---------------|---------------|
| C | 0.9501417263  | -0.3099239985 | 0.7327315399  |
| C | 0.5303586467  | 0.9391636041  | -0.0000674061 |
| C | 0.9503443623  | -0.3101434404 | -0.7323748481 |
| C | -0.2097702820 | -0.9531642943 | 0.0001144602  |
| C | -1.5517569634 | -0.2831847385 | -0.0001753599 |
| C | -0.9982784744 | 0.9112542221  | -0.0002872151 |
| H | -2.5385940325 | -0.7011523065 | -0.0002452893 |
| H | 1.6586423928  | -0.5825817707 | -1.4962222529 |
| H | 1.0818256503  | 1.8675638328  | -0.0001260609 |
| H | 1.6582289734  | -0.5821321101 | 1.4968564321  |

C<sub>6</sub>H<sub>4</sub> Isomer 3

|   |               |               |               |
|---|---------------|---------------|---------------|
| C | 0.5876550957  | 0.9878689759  | 0.1760421993  |
| C | 0.9346202409  | -0.4310719498 | 0.7220650858  |
| C | -0.2978065316 | -1.0972525893 | 0.1509578494  |
| C | 0.9403303815  | -0.3257369578 | -0.6385047890 |
| H | 1.0602794560  | -0.4587250676 | -1.6979511550 |
| H | -0.3408031368 | -2.1704291798 | 0.0417674911  |
| C | -1.3163790204 | -0.1349061769 | -0.0469205455 |
| C | -0.8127295490 | 1.2123774095  | -0.0643226419 |
| H | -2.3603541611 | -0.3945941524 | -0.1740091168 |
| H | 1.3703052241  | 1.7311506884  | 0.2059866223  |

HCCH and H<sub>2</sub>C=C: Addition to C<sub>4</sub>H<sub>4</sub>

II

|   |             |             |             |
|---|-------------|-------------|-------------|
| C | 0.00000000  | 0.00000000  | 0.00000000  |
| C | -0.13149581 | 1.29264067  | 0.74444418  |
| C | 0.00000383  | -0.00004048 | 1.48881739  |
| C | 1.17266593  | -0.57350855 | 0.74439008  |
| H | 1.23494175  | -1.65689554 | 0.74436047  |
| C | 2.46601750  | 0.09181872  | 0.74440484  |
| C | 3.54233680  | 0.64169176  | 0.74441702  |
| H | 4.48872027  | 1.12565575  | 0.74442774  |
| H | -0.66766199 | -0.48725508 | 2.17757849  |
| H | 0.70302237  | 1.98740926  | 0.74446092  |
| H | -1.11482598 | 1.74829944  | 0.74445910  |
| H | -0.66766937 | -0.48717715 | -0.68878415 |

TS1

|   |             |             |             |
|---|-------------|-------------|-------------|
| C | 0.00000000  | 0.00000000  | 0.00000000  |
| C | -0.49647201 | 1.21691205  | -0.72830262 |
| C | -0.00001329 | 0.00005170  | -1.45670067 |
| C | -1.01428500 | -0.83449700 | -0.72837070 |
| H | -1.03201999 | -1.91937004 | -0.72840904 |
| C | -2.27334302 | -0.03149391 | -0.72833071 |
| C | -3.48871299 | 0.27657496  | -0.72830869 |
| H | -4.55054100 | 0.14766100  | -0.72830358 |
| H | 0.71572600  | -0.23464400 | -2.22216500 |
| H | 0.07579699  | 2.14231503  | -0.72827499 |
| H | 0.71575326  | -0.23475004 | 0.76543461  |
| H | -2.52553399 | 1.21788594  | -0.72828407 |

I2

|   |               |               |               |
|---|---------------|---------------|---------------|
| C | 0.0000000000  | -0.7191854474 | -1.2914237997 |
| C | 0.0000000000  | 0.7191854474  | -1.2914237997 |
| C | 0.9894981441  | 0.0000000000  | -0.3687838730 |
| C | -0.9894981441 | 0.0000000000  | -0.3687838730 |
| H | -2.0672763956 | 0.0000000000  | -0.4328088955 |
| H | 2.0672763956  | 0.0000000000  | -0.4328088955 |
| C | 0.0000000000  | 0.0000000000  | 0.7676693596  |
| C | 0.0000000000  | 0.0000000000  | 2.0967923893  |
| H | -0.9289112643 | 0.0000000000  | 2.6509483020  |
| H | 0.9289112643  | 0.0000000000  | 2.6509483020  |
| H | 0.0000000000  | 1.5341569879  | -1.9901626083 |
| H | 0.0000000000  | -1.5341569879 | -1.9901626083 |

TS2

|   |           |           |           |
|---|-----------|-----------|-----------|
| C | 0.975732  | -0.092322 | -0.724622 |
| C | 0.099671  | -1.082777 | 0.003913  |
| C | 1.002641  | -0.077602 | 0.711942  |
| C | 0.289780  | 1.073238  | -0.006920 |
| H | 0.755531  | 2.047419  | -0.034186 |
| C | -1.198508 | 0.897059  | 0.107182  |
| C | -1.291437 | -0.502142 | 0.041545  |
| H | -2.192260 | -1.071393 | 0.235449  |
| H | -1.661640 | 0.178176  | -0.959343 |
| H | 1.775602  | -0.143502 | 1.457522  |
| H | 0.332544  | -2.137935 | -0.001453 |
| H | 1.722951  | -0.165477 | -1.496235 |



## I3

|   |             |             |             |
|---|-------------|-------------|-------------|
| C | 0.00000000  | 0.00000000  | 0.00000000  |
| C | -0.00000000 | -1.49323943 | -0.27972840 |
| C | -0.00000000 | -1.55082113 | -1.77772512 |
| C | 0.74325777  | -0.34265506 | -2.29630859 |
| C | -0.00000000 | 0.59588895  | -1.37558213 |
| C | -0.74325777 | -0.34265506 | -2.29630859 |
| H | -1.33593504 | -0.17751476 | -3.17786451 |
| H | 0.00000000  | 1.66440675  | -1.57766795 |
| H | 1.33593504  | -0.17751476 | -3.17786451 |
| H | -0.00000000 | -2.47374099 | -2.35286677 |
| H | 0.87695010  | 0.22794172  | 0.60128391  |
| H | -0.87695010 | 0.22794172  | 0.60128391  |

## TS3

|   |           |           |           |
|---|-----------|-----------|-----------|
| C | -0.969668 | -0.220599 | 0.753582  |
| C | 0.093690  | -1.048572 | 0.018447  |
| C | -1.014240 | -0.292371 | -0.688424 |
| C | -0.520436 | 1.019407  | -0.032989 |
| H | -1.154564 | 1.893316  | -0.053041 |
| C | 0.997082  | 1.115278  | 0.047527  |
| C | 1.236494  | -0.116965 | -0.177972 |
| H | -1.759579 | -0.550513 | -1.422842 |
| H | 0.129434  | -2.126276 | 0.033891  |
| H | -1.690843 | -0.406504 | 1.533265  |
| H | 2.680715  | -0.743491 | -0.187877 |
| H | 2.857304  | -0.803599 | 0.575567  |

## TS6

|   |             |             |             |
|---|-------------|-------------|-------------|
| C | 0.00000000  | 0.00000000  | 0.00000000  |
| C | -1.31158800 | 0.39844000  | -0.38197800 |
| C | -2.11280800 | -0.72690139 | -0.59117404 |
| C | -1.31160293 | -1.85216120 | -0.38148259 |
| C | -0.00000964 | -1.45357047 | 0.00031996  |
| C | 0.76642100  | -0.72707925 | -1.31245302 |
| H | -0.01027400 | -0.72724372 | -2.08298891 |
| H | 0.71213700  | -2.07635900 | 0.51667000  |
| H | -1.61181149 | -2.87511700 | -0.55794125 |
| H | -3.11378300 | -0.72698282 | -0.99125605 |
| H | -1.61178300 | 1.42132200  | -0.55888700 |
| H | 0.71215490  | 0.62300635  | 0.51607581  |

I5

|   |              |              |              |
|---|--------------|--------------|--------------|
| C | -0.529355638 | -0.323550517 | -0.828861689 |
| C | -0.176627298 | -1.199671351 | 0.317839779  |
| C | 0.217522701  | -0.434200995 | 1.383939161  |
| C | 0.113598708  | 0.950006792  | 1.003688640  |
| C | -0.341909548 | 1.057909170  | -0.286505561 |
| H | -0.542280001 | 1.965754408  | -0.831892770 |
| H | 0.355043047  | 1.785935633  | 1.646257386  |
| H | 0.620966246  | -0.795055056 | 2.313153323  |
| H | -0.137351118 | -2.277479454 | 0.253038469  |
| C | 0.683412652  | -0.046077672 | -1.669795325 |
| H | 1.537640840  | -0.141951956 | -0.974800321 |
| H | -1.436507248 | -0.526760701 | -1.393021150 |

TS7

|   |           |           |           |
|---|-----------|-----------|-----------|
| C | -0.513844 | 0.925750  | -0.364902 |
| C | 0.966613  | 0.992467  | -0.107993 |
| C | 1.383383  | -0.251294 | 0.170527  |
| C | 0.316980  | -1.259433 | 0.009521  |
| C | -0.937718 | -0.768475 | -0.255044 |
| H | -1.684999 | -1.298265 | -0.831881 |
| H | 0.564053  | -2.309658 | -0.091784 |
| H | 2.400365  | -0.523186 | 0.416436  |
| H | 1.569180  | 1.886755  | -0.136702 |
| C | -1.390395 | 0.474393  | 0.617911  |
| H | -0.948010 | 0.473231  | 1.613242  |
| H | -0.850705 | 1.090674  | -1.389425 |

TS8

|   |           |           |           |
|---|-----------|-----------|-----------|
| C | 0.823166  | -0.596200 | -0.517917 |
| C | -0.454811 | -1.184451 | -0.003889 |
| C | -1.446365 | -0.248264 | 0.130507  |
| C | -0.900780 | 1.031095  | -0.056170 |
| C | 0.506194  | 0.980795  | -0.076737 |
| H | 1.076725  | 1.816361  | -0.463664 |
| H | -1.457823 | 1.950620  | -0.157164 |
| H | -2.453378 | -0.445464 | 0.467382  |
| H | -0.491234 | -2.214537 | 0.317781  |
| C | 1.405657  | -0.048942 | 0.624192  |
| H | 2.471344  | 0.135802  | 0.722274  |
| H | 1.255992  | -0.846976 | -1.486529 |
